# Supplementary material for: Predicting carob tree physiological parameters under different irrigation systems using Random Forest and Planet satellite images
Source: PubMed Central journal article supplement (PMC10989058; doi:10.3389/fpls.2024.1302435), 2024-03-19
Supplement: DataSheet_2.pdf [file DataSheet_2.pdf]

**Datos Cliente**
**CEBAS-CSIC**

 Campus Universitario, 25  
 30100 Espinardo Murcia (ESPAÑA)

**Interlocutor:** Francisco Pedrero

**Datos Laboratorio**
**Muestreo:** Cliente

**Recogida:** Cliente - (Francisco Pedrero)

**Entrada:** 30/06/2021 - 13:19 **Inicio:** 05/07/2021 **Finalización:** 12/07/2021

**Ref.: ALGARROBO 2**
**Descripción:** Suelo ( 2 kg aprox. en bolsa de plástico )

**Matriz:** Suelo

**Descripción:** Suelo ( 2 kg aprox. en bolsa de plástico )

**Condición:**
**Obs.:**

## ANÁLISIS DE SUELO (físico-químico)

| GRANULOMETRÍA (fracción <2mm) | Resultado  | Textura (U.S.D.A) | Metodología             |
|-------------------------------|------------|-------------------|-------------------------|
| * Arena (2-0,05 mm)           | 48 % (p/p) | <b>Franco</b>     | Densímetro de Bouyoucos |
| * Limo (0,05-0,002)           | 30 % (p/p) |                   | Densímetro de Bouyoucos |
| * Arcilla (<0,002 mm)         | 22 % (p/p) |                   | Densímetro de Bouyoucos |
| * Densidad aparente           | 1,491 g/cc |                   | Cálculo matemático      |

| SALINIDAD                                       | Resultado              | M.BAJO** | BAJO** | MEDIO** | ALTO** | M.ALTO** |                                                     |
|-------------------------------------------------|------------------------|----------|--------|---------|--------|----------|-----------------------------------------------------|
| Conductividad elec.(25°C) ext. acuoso 1/5 (p/v) | 0,154 mS/cm            |          |        |         |        |          | PTA-FQ-012, conductímetro, basado en UNE 77308      |
| Cloruro sol. en extracto acuoso 1/5 (v/v)       | Cl < 0,070 meq/100g    |          |        |         |        |          | PTA-FQ-012, c. iónica, basado en UNE-EN 10304-1     |
| Sulfato sol. en extracto acuoso 1/5 (p/v)       | Yeso < 0,00448 % (p/p) |          |        |         |        |          | PTA-FQ-012, c. iónica, basado en UNE-EN 10304-1     |
| Sodio asimilable                                | Na < 0,087 meq/100g    |          |        |         |        |          | PTA-FQ-009, BaCl2-TEA, ICP-AES, basado en ISO 22036 |

| REACCIÓN DEL SUELO              | Resultado          | M.BAJO** | BAJO** | MEDIO** | ALTO** | M.ALTO** |                                              |
|---------------------------------|--------------------|----------|--------|---------|--------|----------|----------------------------------------------|
| pH en KCl 1M extracto 1/2 (v/v) | 7,85 Ud. pH        |          |        |         |        |          | PTA-FQ-004, pH-metro, basado en UNE-EN 13027 |
| * Caliza total                  | CaCO3 40,4 % CaCO3 |          |        |         |        |          | PTA-FQ-154, analizador carbono inorgánico    |
| * Caliza activa                 | CaCO3 6,59 % CaCO3 |          |        |         |        |          | PTA-FQ-154, analizador carbono inorgánico    |

| MATERIA ORGÁNICA                   | Resultado       | M.BAJO** | BAJO** | MEDIO** | ALTO** | M.ALTO** |                                        |
|------------------------------------|-----------------|----------|--------|---------|--------|----------|----------------------------------------|
| * Materia orgánica total           | 1,108 % (p/p)   |          |        |         |        |          | PTA-FQ-036, cálculo matemático         |
| * Carbono orgánico total           | C 0,643 % (p/p) |          |        |         |        |          | PTA-FQ-036, analizador elemental       |
| * Relación carbono/nitrógeno total | C/N 5,4         |          |        |         |        |          | Cálculo matemático, C.orgánico/N.total |

Este informe sólo afecta a la muestra sometida a ensayo. En caso de que el laboratorio no sea el responsable del muestreo los resultados aplican a la muestra como se recibió. El cálculo de incertidumbres está a disposición del cliente. El laboratorio se hace responsable de las informaciones suministradas en este informe excepto las aportadas por el cliente y las opiniones y/o interpretaciones emitidas con carácter meramente informativo. Es responsabilidad del cliente la correcta interpretación de los resultados.

Este informe no deberá reproducirse total o parcialmente sin la aprobación por escrito de este laboratorio.

FITOSOIL LABORATORIOS, S.L. - CIF: ESB 30553085 Inscrito en el Reg. Mercantil de Murcia, Tomo-1344, MU-23384, Folio 111. Colegiado por el COB con el Nº 6862-J

Los ensayos marcados con (\*), (\*\*\*) y las opiniones, interpretaciones, etc...  
 marcados con (\*\*) no están amparados por la acreditación de ENAC.

| MACRONUTRIENTES PRIMARIOS                       |       | Resultado          |          | M.BAJO** | BAJO** | MEDIO** | ALTO** | M.ALTO** | Metodología                                         |
|-------------------------------------------------|-------|--------------------|----------|----------|--------|---------|--------|----------|-----------------------------------------------------|
| Nitrógeno total                                 | N     | 0,119              | %(p/p)   |          |        |         |        |          | PTA-FQ-036, Dumas, basado en UNE-EN 13654-2         |
| Nitrógeno nítrico soluble ext. acuoso 1/5 (p/v) | N     | 9,2                | mg/kg    |          |        |         |        |          | PTA-FQ-012, c. iónica, basado en UNE-EN 10304-1     |
| Nitrato soluble ext. acuoso 1/5 (p/v)           | NO3   | 40,7               | mg/kg    |          |        |         |        |          | PTA-FQ-012, c. iónica, basado en UNE-EN 10304-1     |
| Fósforo asimilable                              | P     | < 10,0             | mg/kg    |          |        |         |        |          | PTA-FQ-015, Olsen, ICP-AES, basado en ISO 22036     |
| Potasio asimilable                              | K     | 0,350              | meq/100g |          |        |         |        |          | PTA-FQ-009, BaCl2-TEA, ICP-AES, basado en ISO 22036 |
| MACRONUTRIENTES SECUNDARIOS                     |       | Resultado          |          | M.BAJO** | BAJO** | MEDIO** | ALTO** | M.ALTO** | Metodología                                         |
| Calcio asimilable                               | Ca    | 10,6               | meq/100g |          |        |         |        |          | PTA-FQ-009, BaCl2-TEA, ICP-AES, basado en ISO 22036 |
| Magnesio asimilable                             | Mg    | 0,55               | meq/100g |          |        |         |        |          | PTA-FQ-009, BaCl2-TEA, ICP-AES, basado en ISO 22036 |
| MICRONUTRIENTES                                 |       | Resultado          |          | M.BAJO** | BAJO** | MEDIO** | ALTO** | M.ALTO** | Metodología                                         |
| Hierro asimilable                               | Fe    | 3,07               | mg/Kg    |          |        |         |        |          | PTA-FQ-010, ext. DPTA, ICP-AES, basado en ISO 22036 |
| Manganeso asimilable                            | Mn    | 13,4               | mg/Kg    |          |        |         |        |          | PTA-FQ-010, ext. DPTA, ICP-AES, basado en ISO 22036 |
| Zinc asimilable                                 | Zn    | 0,73               | mg/Kg    |          |        |         |        |          | PTA-FQ-010, ext. DPTA, ICP-AES, basado en ISO 22036 |
| Cobre asimilable                                | Cu    | 0,67               | mg/Kg    |          |        |         |        |          | PTA-FQ-010, ext. DPTA, ICP-AES, basado en ISO 22036 |
| * Boro asimilable                               | B     | 0,175              | mg/Kg    |          |        |         |        |          | PTA-FQ-011, ext. acuosa, ICP-AES                    |
| ESTUDIO DE LOS CATIONES ASIMILABLES             |       | Resultado          |          | M.BAJO** | BAJO** | MEDIO** | ALTO** | M.ALTO** | Metodología                                         |
| Proporciones relativas                          |       | % Cat. asimilables |          | M.BAJO** | BAJO** | MEDIO** | ALTO** | M.ALTO** | Metodología                                         |
| * Proporción relativa de sodio (PSI)            |       | 0,4                |          |          |        |         |        |          | Cálculo matemático                                  |
| * Proporción relativa de potasio                |       | 3,0                |          |          |        |         |        |          | Cálculo matemático                                  |
| * Proporción relativa de calcio                 |       | 91,8               |          |          |        |         |        |          | Cálculo matemático                                  |
| * Proporción relativa de magnesio               |       | 4,8                |          |          |        |         |        |          | Cálculo matemático                                  |
| Interacciones                                   |       | Resultado          |          | M.BAJO** | BAJO** | MEDIO** | ALTO** | M.ALTO** | Metodología                                         |
| * Relación calcio/magnesio                      | Ca/Mg | 19,2               |          |          |        |         |        |          | Cálculo matemático                                  |
| * Relación potasio/magnesio                     | K/Mg  | 0,63               |          |          |        |         |        |          | Cálculo matemático                                  |

Este informe sólo afecta a la muestra sometida a ensayo. En caso de que el laboratorio no sea el responsable del muestreo los resultados aplican a la muestra como se recibió. El cálculo de incertidumbres está a disposición del cliente. El laboratorio se hace responsable de las informaciones suministradas en este informe excepto las aportadas por el cliente y las opiniones y/o interpretaciones emitidas con carácter meramente informativo. Es responsabilidad del cliente la correcta interpretación de los resultados.

Este informe no deberá reproducirse total o parcialmente sin la aprobación por escrito de este laboratorio.

Los ensayos marcados con (\*), (\*\*\*) y las opiniones, interpretaciones, etc...  
 marcados con (\*\*) no están amparados por la acreditación de ENAC.

| NUTRIENTES FERTILIZANTES (resumen)              |      |        | Resultado |        |       | Metodología                                         |
|-------------------------------------------------|------|--------|-----------|--------|-------|-----------------------------------------------------|
| Nitrógeno total                                 | N    | 1.190  | mg/kg     | 4.435  | kg/Ha | PTA-FQ-036, Dumas, basado en UNE-EN 13654-2         |
| Nitrógeno nítrico soluble ext. acuoso 1/5 (p/v) | N    | 9,2    | mg/kg     | 34,3   | kg/Ha | PTA-FQ-012. c. iónica, basado en UNE-EN 10304-1     |
| Nitrato soluble ext. acuoso 1/5 (p/v)           | NO3  | 40,7   | mg/kg     | 152    | kg/Ha | PTA-FQ-012, c. iónica, basado en UNE-EN 10304-1     |
| Fósforo asimilable                              | P2O5 | < 22,9 | mg/kg     | < 85   | kg/Ha | PTA-FQ-015, Olsen, ICP-AES, basado en ISO 22036     |
| Potasio asimilable                              | K2O  | 164    | mg/kg     | 612    | kg/Ha | PTA-FQ-009, BaCl2-TEA, ICP-AES, basado en ISO 22036 |
| Calcio asimilable                               | CaO  | 2.969  | mg/kg     | 11.065 | kg/Ha | PTA-FQ-009, BaCl2-TEA, ICP-AES, basado en ISO 22036 |
| Magnesio asimilable                             | MgO  | 111    | mg/kg     | 414    | kg/Ha | PTA-FQ-009, BaCl2-TEA, ICP-AES, basado en ISO 22036 |
| Hierro asimilable                               | Fe   | 3,07   | mg/kg     | 11,5   | kg/Ha | PTA-FQ-010, ext. DPTA, ICP-AES, basado en ISO 22036 |
| Manganeso asimilable                            | Mn   | 13,4   | mg/kg     | 50     | kg/Ha | PTA-FQ-010, ext. DPTA, ICP-AES, basado en ISO 22036 |
| Zinc asimilable                                 | Zn   | 0,73   | mg/kg     | 2,71   | kg/Ha | PTA-FQ-010, ext. DPTA, ICP-AES, basado en ISO 22036 |
| Cobre asimilable                                | Cu   | 0,67   | mg/kg     | 2,48   | kg/Ha | PTA-FQ-010, ext. DPTA, ICP-AES, basado en ISO 22036 |
| * Boro asimilable                               | B    | 0,175  | mg/kg     | 0,65   | kg/Ha | PTA-FQ-011, ext. acuosa, ICP-AES                    |

Resultados obtenidos sobre muestra seca al aire y fracción <2mm. p/p: peso/peso. p/v: peso/volumen.

Ha: abreviatura referida a hectárea surco para una superficie de 10000 m<sup>2</sup> y una profundidad de 25 cm.

Los orientadores se establecen de modo general para un suelo con fines agronómicos, independientemente del tipo de cultivo y modalidad técnica empleada para la explotación del mismo.

Responsable Técnico Dpto. FÍSICO QUÍMICO  
 Bernardo Marín Romero

Director Técnico  
 Antonio Abellán Caravaca

Este informe sólo afecta a la muestra sometida a ensayo. En caso de que el laboratorio no sea el responsable del muestreo los resultados aplican a la muestra como se recibió. El cálculo de incertidumbres está a disposición del cliente. El laboratorio se hace responsable de las informaciones suministradas en este informe excepto las aportadas por el cliente y las opiniones y/o interpretaciones emitidas con carácter meramente informativo. Es responsabilidad del cliente la correcta interpretación de los resultados.  
 Este informe no deberá reproducirse total o parcialmente sin la aprobación por escrito de este laboratorio.

FITOSOIL LABORATORIOS, S.L. - CIF: ESB 30553085 Inscrito en el Reg. Mercantil de Murcia, Tomo-1344, MU-23384, Folio 111. Colegiado por el COB con el Nº 6862-J  
 Pol.Ind.Oeste. c/ Alcalde Clemente García, parc.24/37. Mód.D-1 y D-2 - Envío Postal: Apdo. Correos 200 - 30169 - San Ginés-Murcia(España)
